# Supplementary material for: Mammosphere Formation in Breast Carcinoma Cell Lines Depends upon Expression of E-cadherin
Source: PLoS One. 2013 Oct 4;8(10):e77281. doi: 10.1371/journal.pone.0077281 (PMC3790762; doi:10.1371/journal.pone.0077281)
Supplement: File S2 — Gene list of the differentially expressed transcripts between LTSF, STSF and NSF cell lines. (XLSX) [file pone.0077281.s006.xlsx]

## Sheet: Gene List
Gene symbol	Gene name	GO Biological process	GO Molecular Function	GO Cellular component	KEGG Pathway
GLRB	glycine receptor, beta	startle response (GO:0001964),Êtransport (GO:0006810),Êion transport (GO:0006811),Êchloride transport (GO:0006821),Êgamma-aminobutyric acid signaling pathway (GO:0007214),Êneuropeptide signaling pathway (GO:0007218),Êsynaptic transmission (GO:0007268),Êacrosome reaction (GO:0007340),Ênervous system development (GO:0007399),Êvisual perception (GO:0007601),adult walking behavior (GO:0007628),Êregul…	GABA-A receptor activity (GO:0004890),Êion channel activity (GO:0005216),Êextracellular ligand-gated ion channel activity (GO:0005230),Êbinding (GO:0005488),Êprotein binding (GO:0005515),Êglycine binding (GO:0016594),Êextracellular-glycine-gated chloride channel activity (GO:0016934),Êneurotransmitter receptor activity (GO:0030594),Êchloride ion binding (GO:0031404)	membrane fraction (GO:0005624),Êplasma membrane (GO:0005886),Êintegral to plasma membrane (GO:0005887),Êmembrane (GO:0016020),Êintegral to membrane (GO:0016021),Êcell junction (GO:0030054),Êchloride channel complex (GO:0034707),synapse (GO:0045202),Êpostsynaptic membrane (GO:0045211)	Neuroactive ligand-receptor interaction (hsa04080)
FOXD4L3	forkhead box D4-like 3	regulation of transcription, DNA-dependent (GO:0006355)	transcription factor activity (GO:0003700),Êsequence-specific DNA binding (GO:0043565)	nucleus (GO:0005634)
ALCAM	activated leukocyte cell adhesion molecule	cell adhesion (GO:0007155),Êsignal transduction (GO:0007165),Êaxon guidance (GO:0007411),Êmotor axon guidance (GO:0008045)	receptor binding (GO:0005102),Êprotein binding (GO:0005515)	external side of plasma membrane (GO:0009897),Êmembrane (GO:0016020),Êintegral to membrane (GO:0016021),Êaxon (GO:0030424),Êcell soma (GO:0043025)	Cell adhesion molecules (CAMs) (hsa04514)
GIN1	gypsy retrotransposon integrase 1	DNA integration (GO:0015074)	nucleic acid binding (GO:0003676),ÊDNA binding (GO:0003677)
FAM22F	family with sequence similarity 22, member F
UGT2B11	UDP glucuronosyltransferase 2 family, polypeptide B11	xenobiotic metabolic process (GO:0006805),Êmetabolic process (GO:0008152),Êestrogen metabolic process (GO:0008210)	glucuronosyltransferase activity (GO:0015020),Êtransferase activity, transferring hexosyl groups (GO:0016758)	endoplasmic reticulum (GO:0005783),Êmicrosome (GO:0005792),Êmembrane (GO:0016020),Êintegral to membrane (GO:0016021)	Pentose and glucuronate interconversions (hsa00040), Ascorbate and aldarate metabolism (hsa00053), Steroid hormone biosynthesis (hsa00140), Starch and sucrose metabolism (hsa00500), Retinol metabolism (hsa00830), Porphyrin and chlorophyll metabolism (hsa00860), Metabolism of xenobiotics by cytochrome P450 (hsa00980), Drug metabolism - cytochrome P450 (hsa00982), Drug metabolism - other enzymes (h…
ZNF786	zinc finger protein 786	regulation of transcription, DNA-dependent (GO:0006355)	nucleic acid binding (GO:0003676),ÊDNA binding (GO:0003677),Êzinc ion binding (GO:0008270),Êmetal ion binding (GO:0046872)	intracellular (GO:0005622),Ênucleus (GO:0005634)
C12orf26	chromosome 12 open reading frame 26
LONRF2	LON peptidase N-terminal domain and ring finger 2	proteolysis (GO:0006508),Êprotein ubiquitination (GO:0016567)	ATP-dependent peptidase activity (GO:0004176),Êubiquitin-protein ligase activity (GO:0004842),Êprotein binding (GO:0005515),zinc ion binding (GO:0008270),Êmetal ion binding (GO:0046872)	ubiquitin ligase complex (GO:0000151)
MAPT	microtubule-associated protein tau	microtubule cytoskeleton organization (GO:0000226),Ênegative regulation of microtubule depolymerization (GO:0007026),positive regulation of microtubule polymerization (GO:0031116),Êpositive regulation of axon extension (GO:0045773),Êgeneration of neurons (GO:0048699)	structural constituent of cytoskeleton (GO:0005200),Êmicrotubule binding (GO:0008017),Êlipoprotein binding (GO:0008034),ÊSH3 domain binding (GO:0017124),Êenzyme binding (GO:0019899),Êapolipoprotein E binding (GO:0034187),Êidentical protein binding (GO:0042802)	cytoplasm (GO:0005737),Êcytosol (GO:0005829),Êcytoskeleton (GO:0005856),Êmicrotubule (GO:0005874),Êmicrotubule associated complex (GO:0005875),Êplasma membrane (GO:0005886),Êaxon (GO:0030424),Êgrowth cone (GO:0030426),Êcell projection (GO:0042995),Êtubulin complex (GO:0045298)	MAPK signaling pathway (hsa04010), Alzheimer's disease (hsa05010)
GREB1	growth regulation by estrogen in breast cancer 1			membrane (GO:0016020),Êintegral to membrane (GO:0016021)
CBFA2T3	core-binding factor, runt domain, alpha subunit 2; translocated to, 3	regulation of transcription, DNA-dependent (GO:0006355),ÊG-protein coupled receptor protein signaling pathway (GO:0007186),cell proliferation (GO:0008283),Êcell differentiation (GO:0030154)	lysosphingolipid and lysophosphatidic acid receptor activity (GO:0001619),Êtranscription factor activity (GO:0003700),Êprotein binding (GO:0005515),Êzinc ion binding (GO:0008270),Êmetal ion binding (GO:0046872)	Golgi membrane (GO:0000139),Êintracellular (GO:0005622),Ênucleus (GO:0005634),Ênucleoplasm (GO:0005654),Ênucleolus (GO:0005730),ÊGolgi apparatus (GO:0005794),Êmembrane (GO:0016020),Êintegral to membrane (GO:0016021)
FEZ1	fasciculation and elongation protein zeta 1 (zygin I)	cell adhesion (GO:0007155),Ênervous system development (GO:0007399),Êaxon guidance (GO:0007411)	protein kinase C binding (GO:0005080),Êprotein binding (GO:0005515),Êgamma-tubulin binding (GO:0043015),Êprotein N-terminus binding (GO:0047485)	cytoplasm (GO:0005737),Êcentrosome (GO:0005813),Êplasma membrane (GO:0005886)
ZMAT1	zinc finger, matrin type 1	homoiothermy (GO:0042309),Êresponse to freezing (GO:0050826)	nucleic acid binding (GO:0003676),ÊDNA binding (GO:0003677),Êzinc ion binding (GO:0008270),Êmetal ion binding (GO:0046872),Êice binding (GO:0050825)	intracellular (GO:0005622),Ênucleus (GO:0005634)
OLFM1	olfactomedin 1	multicellular organismal development (GO:0007275),Ênervous system development (GO:0007399),Êprotein oligomerization (GO:0051259)	protein binding (GO:0005515)	extracellular space (GO:0005615),Êendoplasmic reticulum (GO:0005783),Êendoplasmic reticulum lumen (GO:0005788),membrane (GO:0016020)
MAF	v-maf musculoaponeurotic fibrosarcoma oncogene homolog (avian)	cytokine production (GO:0001816),Êlens development in camera-type eye (GO:0002088),Êregulation of transcription, DNA-dependent (GO:0006355),Êtype I hypersensitivity (GO:0016068),Êregulation of chondrocyte differentiation (GO:0032330),homoiothermy (GO:0042309),Êregulation of transcription (GO:0045449),Êpositive regulation of transcription from RNA polymerase II promoter (GO:0045944),Êcell developm…	DNA binding (GO:0003677),Êdouble-stranded DNA binding (GO:0003690),Êtranscription factor activity (GO:0003700),ÊRNA polymerase II transcription factor activity (GO:0003702),Êstructural molecule activity (GO:0005198),Êprotein binding (GO:0005515),transcription activator activity (GO:0016563),Êprotein homodimerization activity (GO:0042803),Êsequence-specific DNA binding (GO:0043565),Êprotein hetero…	chromatin (GO:0000785),Ênucleus (GO:0005634),Êcytoplasm (GO:0005737),Êviral capsid (GO:0019028)
DLL1	delta-like 1 (Drosophila)	cell fate determination (GO:0001709),Êsomitogenesis (GO:0001756),Êsomite specification (GO:0001757),Êcell communication (GO:0007154),ÊNotch signaling pathway (GO:0007219),Êmulticellular organismal development (GO:0007275),Êdetermination of left/right symmetry (GO:0007368),Êcompartment specification (GO:0007386),Êhemopoiesis (GO:0030097),Êregulation of cell adhesion (GO:0030155),Ênegative regulati…	Notch binding (GO:0005112),Êcalcium ion binding (GO:0005509),Êprotein binding (GO:0005515)	extracellular region (GO:0005576),Êplasma membrane (GO:0005886),Êintegral to plasma membrane (GO:0005887),Êmembrane (GO:0016020),Êintegral to membrane (GO:0016021),Êcytoplasmic vesicle (GO:0031410)	Notch signaling pathway (hsa04330)
DTNA	dystrobrevin, alpha	regulation of transcription, DNA-dependent (GO:0006355),Êstriated muscle contraction (GO:0006941),Êsignal transduction (GO:0007165),Êneuromuscular synaptic transmission (GO:0007274)	transcription factor activity (GO:0003700),Êcalcium ion binding (GO:0005509),Êprotein binding (GO:0005515),Êzinc ion binding (GO:0008270)	nucleus (GO:0005634),Êcytoplasm (GO:0005737),Êmicrosome (GO:0005792),Êcell junction (GO:0030054),Êsynapse (GO:0045202)
PPP2R2C	protein phosphatase 2 (formerly 2A), regulatory subunit B, gamma isoform	signal transduction (GO:0007165)	protein phosphatase type 2A regulator activity (GO:0008601)	protein phosphatase type 2A complex (GO:0000159)	Tight junction (hsa04530)
ADRA2C	adrenergic, alpha-2C-, receptor	activation of MAPK activity (GO:0000187),Êregulation of transcription, DNA-dependent (GO:0006355),Êsignal transduction (GO:0007165),ÊG-protein coupled receptor protein signaling pathway (GO:0007186),Êcell-cell signaling (GO:0007267)	DNA binding (GO:0003677),Êreceptor activity (GO:0004872),Êligand-dependent nuclear receptor activity (GO:0004879),ÊG-protein coupled receptor activity (GO:0004930),Êadrenoceptor activity (GO:0004935),Êalpha2-adrenergic receptor activity (GO:0004938),dopamine receptor activity (GO:0004952),Êmelanocortin receptor activity (GO:0004977),Êmuscarinic acetylcholine receptor activity (GO:0004981),Êoctopa…	nucleus (GO:0005634),Êendosome (GO:0005768),Êplasma membrane (GO:0005886),Êintegral to plasma membrane (GO:0005887),Êmembrane (GO:0016020),Êintegral to membrane (GO:0016021),Êaxon (GO:0030424)	Neuroactive ligand-receptor interaction (hsa04080)
CACNA1H	calcium channel, voltage-dependent, T type, alpha 1H subunit	ion transport (GO:0006811),Êpotassium ion transport (GO:0006813),Êcalcium ion transport (GO:0006816),Êmuscle contraction (GO:0006936),Êmuscle organ development (GO:0007517),Êmyoblast fusion (GO:0007520),Êregulation of heart contraction (GO:0008016)	ion channel activity (GO:0005216),Êvoltage-gated ion channel activity (GO:0005244),Êvoltage-gated calcium channel activity (GO:0005245),Êvoltage-gated potassium channel activity (GO:0005249),Êcalcium ion binding (GO:0005509),Êlow voltage-gated calcium channel activity (GO:0008332)	nucleus (GO:0005634),Êcytoplasm (GO:0005737),Êplasma membrane (GO:0005886),Êvoltage-gated calcium channel complex (GO:0005891),Êvoltage-gated potassium channel complex (GO:0008076),Êmembrane (GO:0016020),Êintegral to membrane (GO:0016021),Êdendrite (GO:0030425),Êperikaryon (GO:0043204)	MAPK signaling pathway (hsa04010), Calcium signaling pathway (hsa04020)
NDRG2	NDRG family member 2	signal transduction (GO:0007165),Êmulticellular organismal development (GO:0007275),Ênervous system development (GO:0007399),Êcell differentiation (GO:0030154)	molecular_function (GO:0003674)	nucleus (GO:0005634),Êcytoplasm (GO:0005737),ÊGolgi apparatus (GO:0005794),Êcentrosome (GO:0005813),Êcytosol (GO:0005829),Êperinuclear region of cytoplasm (GO:0048471)
IKZF1	IKAROS family zinc finger 1 (Ikaros)	natural killer cell differentiation (GO:0001779),Êregulation of transcription, DNA-dependent (GO:0006355),Êmesoderm development (GO:0007498),Ênegative regulation of gene-specific transcription from RNA polymerase II promoter (GO:0010553),negative regulation of transcription (GO:0016481),Êhemopoiesis (GO:0030097),ÊB cell differentiation (GO:0030183),ÊT cell differentiation (GO:0030217),Êforebrain …	DNA binding (GO:0003677),Êtranscription factor activity (GO:0003700),Êprotein binding (GO:0005515),Êzinc ion binding (GO:0008270),Êpromoter binding (GO:0010843),Êtranscription repressor activity (GO:0016564),Êspecific transcriptional repressor activity (GO:0016566),Êsequence-specific DNA binding (GO:0043565),Êmetal ion binding (GO:0046872),Êprotein heterodimerization activity (GO:0046982)	intracellular (GO:0005622),Ênucleus (GO:0005634),Êcentromeric heterochromatin (GO:0005721)
SIRPG	signal-regulatory protein gamma	cell adhesion (GO:0007155),Êintracellular signaling cascade (GO:0007242),Êcell-cell signaling (GO:0007267),Êpositive regulation of cell proliferation (GO:0008284),Ênegative regulation of cell proliferation (GO:0008285),Êpositive regulation of cell-cell adhesion (GO:0022409),Êpositive regulation of T cell activation (GO:0050870)	protein binding (GO:0005515)	plasma membrane (GO:0005886),Êintegral to membrane (GO:0016021)
GNG4	guanine nucleotide binding protein (G protein), gamma 4	signal transduction (GO:0007165),ÊG-protein coupled receptor protein signaling pathway (GO:0007186),Êregulation of G-protein coupled receptor protein signaling pathway (GO:0008277),Êhormone-mediated signaling pathway (GO:0009755),Ênegative regulation of cell growth (GO:0030308)	signal transducer activity (GO:0004871)	heterotrimeric G-protein complex (GO:0005834),Êplasma membrane (GO:0005886)	Chemokine signaling pathway (hsa04062)
RTP4	receptor (chemosensory) transporter protein 4	detection of chemical stimulus involved in sensory perception of bitter taste (GO:0001580),Êprotein targeting to membrane (GO:0006612)	protein binding (GO:0005515)	cytoplasm (GO:0005737),Êmembrane (GO:0016020),Êintegral to membrane (GO:0016021)
PTGIS	prostaglandin I2 (prostacyclin) synthase	prostaglandin biosynthetic process (GO:0001516),Êfatty acid biosynthetic process (GO:0006633),Êoxidation reduction (GO:0055114)	monooxygenase activity (GO:0004497),Êiron ion binding (GO:0005506),Êprostaglandin-I synthase activity (GO:0008116),Êelectron carrier activity (GO:0009055),Êisomerase activity (GO:0016853),Êheme binding (GO:0020037),Êmetal ion binding (GO:0046872)	endoplasmic reticulum (GO:0005783),Êendoplasmic reticulum lumen (GO:0005788),Êmembrane (GO:0016020),Êintegral to membrane (GO:0016021)	Arachidonic acid metabolism (hsa00590), Metabolic pathways (hsa01100)
EGR1	early growth response 1	negative regulation of transcription from RNA polymerase II promoter (GO:0000122),Êregulation of transcription, DNA-dependent (GO:0006355),Êsulfur metabolic process (GO:0006790),ÊG-protein coupled receptor protein signaling pathway (GO:0007186),central nervous system development (GO:0007417),Êlearning or memory (GO:0007611),Êcarbohydrate biosynthetic process (GO:0016051),Êproteoglycan biosyntheti…	translation repressor activity, nucleic acid binding (GO:0000900),ÊN-acetylgalactosamine 4-O-sulfotransferase activity (GO:0001537),ÊDNA binding (GO:0003677),Êdouble-stranded DNA binding (GO:0003690),Êsingle-stranded DNA binding (GO:0003697),Êtranscription factor activity (GO:0003700),ÊmRNA binding (GO:0003729),ÊG-protein coupled receptor activity (GO:0004930),Êextracellular matrix structural con…	extracellular region (GO:0005576),Êcollagen (GO:0005581),Êcollagen type IV (GO:0005587),Êbasement membrane (GO:0005604),Êintracellular (GO:0005622),Ênucleus (GO:0005634),ÊDNA replication factor A complex (GO:0005662),ÊGolgi apparatus (GO:0005794),Êmembrane (GO:0016020),Êintegral to membrane (GO:0016021)	Focal adhesion (hsa04510), ECM-receptor interaction (hsa04512), Prion diseases (hsa05020), Pathways in cancer (hsa05200), Small cell lung cancer (hsa05222)
FOSB	FBJ murine osteosarcoma viral oncogene homolog B	negative regulation of transcription from RNA polymerase II promoter (GO:0000122),Êregulation of transcription, DNA-dependent (GO:0006355),Êproteolysis (GO:0006508),Êmulticellular organismal development (GO:0007275),Êbehavior (GO:0007610),regulation of transcription (GO:0045449)	DNA binding (GO:0003677),Êtranscription factor activity (GO:0003700),Êserine-type endopeptidase activity (GO:0004252),transcription factor binding (GO:0008134),Êsequence-specific DNA binding (GO:0043565),Êprotein dimerization activity (GO:0046983)	nucleus (GO:0005634)
SPARC	secreted protein, acidic, cysteine-rich (osteonectin)	ossification (GO:0001503),Êsignal transduction (GO:0007165),Êregulation of cell proliferation (GO:0042127)	copper ion binding (GO:0005507),Êcalcium ion binding (GO:0005509),Êcollagen binding (GO:0005518),Êextracellular matrix binding (GO:0050840)	extracellular region (GO:0005576),Êbasement membrane (GO:0005604),Êextracellular matrix (GO:0031012),Êplatelet alpha granule lumen (GO:0031093)
TF	transferrin	response to hypoxia (GO:0001666),Êion transport (GO:0006811),Êiron ion transport (GO:0006826),Êcellular iron ion homeostasis (GO:0006879),Êdefense response (GO:0006952),Êacute-phase response (GO:0006953),Êresponse to organic cyclic substance (GO:0014070),Êferric iron transport (GO:0015682),Êpositive regulation of myelination (GO:0031643)	protein binding (GO:0005515),Êferric iron binding (GO:0008199),Êferric iron transmembrane transporter activity (GO:0015091),metal ion binding (GO:0046872)	extracellular region (GO:0005576),Êbasement membrane (GO:0005604),Êextracellular space (GO:0005615),Êendosome (GO:0005768),Êearly endosome (GO:0005769),Êlate endosome (GO:0005770),Êbasal plasma membrane (GO:0009925),endocytic vesicle (GO:0030139),Êperinuclear region of cytoplasm (GO:0048471),Êrecycling endosome (GO:0055037)
CP	ceruloplasmin (ferroxidase)	ion transport (GO:0006811),Êcopper ion transport (GO:0006825),Êcellular iron ion homeostasis (GO:0006879),Êaging (GO:0007568),Êresponse to nutrient (GO:0007584),Êoxidation reduction (GO:0055114)	ferroxidase activity (GO:0004322),Êcopper ion binding (GO:0005507),Êoxidoreductase activity (GO:0016491),Êmetal ion binding (GO:0046872)	extracellular region (GO:0005576),Êextracellular space (GO:0005615),Êanchored to plasma membrane (GO:0046658)	Porphyrin and chlorophyll metabolism (hsa00860)
WFDC2	WAP four-disulfide core domain 2	proteolysis (GO:0006508),Êspermatogenesis (GO:0007283)	serine-type endopeptidase inhibitor activity (GO:0004867),Êpeptidase inhibitor activity (GO:0030414)	extracellular region (GO:0005576),Êextracellular space (GO:0005615)
HAAO	3-hydroxyanthranilate 3,4-dioxygenase	metabolic process (GO:0008152),Êresponse to zinc ion (GO:0010043),Êpyridine nucleotide biosynthetic process (GO:0019363),NAD metabolic process (GO:0019674),Êquinolinate biosynthetic process (GO:0019805),Êresponse to cadmium ion (GO:0046686),quinolinate metabolic process (GO:0046874),Êoxidation reduction (GO:0055114),Êneuron homeostasis (GO:0070050)	3-hydroxyanthranilate 3,4-dioxygenase activity (GO:0000334),Êiron ion binding (GO:0005506),Êferrous iron binding (GO:0008198),Êelectron carrier activity (GO:0009055),Êoxidoreductase activity (GO:0016491),Êoxygen binding (GO:0019825),metal ion binding (GO:0046872)	soluble fraction (GO:0005625),Êcytoplasm (GO:0005737),Êcytosol (GO:0005829),Êmitochondrial membrane (GO:0031966)	hsa00380,hsa01100
ITGB2	integrin, beta 2 (complement component 3 receptor 3 and 4 subunit)	apoptosis (GO:0006915),Êinflammatory response (GO:0006954),Êcell adhesion (GO:0007155),Êleukocyte adhesion (GO:0007159),Êcell-matrix adhesion (GO:0007160),Êintegrin-mediated signaling pathway (GO:0007229),Êcell-cell signaling (GO:0007267),Êregulation of cell shape (GO:0008360),Êneutrophil chemotaxis (GO:0030593),Êregulation of peptidyl-tyrosine phosphorylation (GO:0050730)	glycoprotein binding (GO:0001948),Êreceptor activity (GO:0004872),Êbinding (GO:0005488),Êprotein kinase binding (GO:0019901)	cytoplasm (GO:0005737),Êplasma membrane (GO:0005886),Êintegrin complex (GO:0008305),Êintegral to membrane (GO:0016021)	Cell adhesion molecules (CAMs) (hsa04514), Natural killer cell mediated cytotoxicity (hsa04650), Leukocyte transendothelial migration (hsa04670), Regulation of actin cytoskeleton (hsa04810), Viral myocarditis (hsa05416)
NRP2	neuropilin 2	neural crest cell migration (GO:0001755),Êcell adhesion (GO:0007155),Êmulticellular organismal development (GO:0007275),nervous system development (GO:0007399),Êaxon guidance (GO:0007411),Êheart development (GO:0007507),Êcell differentiation (GO:0030154),Ênegative chemotaxis (GO:0050919)	receptor activity (GO:0004872),Êvascular endothelial growth factor receptor activity (GO:0005021),Êprotein binding (GO:0005515),GO:0017154	membrane fraction (GO:0005624),Êplasma membrane (GO:0005886),Êmembrane (GO:0016020),Êintegral to membrane (GO:0016021),Êaxon (GO:0030424)
MDFI	MyoD family inhibitor	negative regulation of transcription from RNA polymerase II promoter (GO:0000122),Êactivation of JUN kinase activity (GO:0007257),Êembryonic development (GO:0009790),Êdorsal/ventral axis specification (GO:0009950),Êcell differentiation (GO:0030154),Ênegative regulation of Wnt receptor signaling pathway (GO:0030178),Êcytoplasmic sequestering of transcription factor (GO:0042994),Ênegative regulatio…	receptor activity (GO:0004872),Êprotein binding (GO:0005515)	nucleus (GO:0005634),Êcytoplasm (GO:0005737)
MEF2D	myocyte enhancer factor 2D	osteoblast differentiation (GO:0001649),Êendochondral ossification (GO:0001958),Êchondrocyte differentiation (GO:0002062),regulation of transcription, DNA-dependent (GO:0006355),Êapoptosis (GO:0006915),Êmulticellular organismal development (GO:0007275),Ênervous system development (GO:0007399),Êmuscle organ development (GO:0007517),Êcell differentiation (GO:0030154)	DNA binding (GO:0003677),Êtranscription factor activity (GO:0003700),Êligand-dependent nuclear receptor activity (GO:0004879),transcription activator activity (GO:0016563),Êsequence-specific DNA binding (GO:0043565),Ênutrient reservoir activity (GO:0045735)	nucleus (GO:0005634),Êcytoplasm (GO:0005737)
GCNT2	glucosaminyl (N-acetyl) transferase 2, I-branching enzyme (I blood group)	glycosaminoglycan biosynthetic process (GO:0006024),Êmulticellular organismal development (GO:0007275)	N-acetyllactosaminide beta-1,6-N-acetylglucosaminyltransferase activity (GO:0008109),Êacetylglucosaminyltransferase activity (GO:0008375),Êtransferase activity, transferring glycosyl groups (GO:0016757)	membrane fraction (GO:0005624),ÊGolgi apparatus (GO:0005794),Êmembrane (GO:0016020),Êintegral to membrane (GO:0016021)	Glycosphingolipid biosynthesis (hsa00601), Metabolic pathways (hsa01100)
VSTM2L	V-set and transmembrane domain containing 2 like
ZNF662	zinc finger protein 662	regulation of transcription, DNA-dependent (GO:0006355)	nucleic acid binding (GO:0003676),ÊDNA binding (GO:0003677),Êzinc ion binding (GO:0008270),Êmetal ion binding (GO:0046872)	intracellular (GO:0005622),Ênucleus (GO:0005634)
EDN2	endothelin 2	prostaglandin biosynthetic process (GO:0001516),Êovarian follicle rupture (GO:0001543),Êpositive regulation of leukocyte chemotaxis (GO:0002690),Êhormonal regulation of the force of heart contraction (GO:0003058),Êpositive regulation of the force of heart contraction by chemical signal (GO:0003099),Êregulation of systemic arterial blood pressure by endothelin (GO:0003100),elevation of cytosolic c…	hormone activity (GO:0005179),Êendothelin B receptor binding (GO:0031708)	extracellular region (GO:0005576),Êextracellular space (GO:0005615)	Neuroactive ligand-receptor interaction (hsa04080), Vascular smooth muscle contraction (hsa04270), Hypertrophic cardiomyopathy (HCM) (hsa05410)
PAGE2	P antigen family, member 2 (prostate associated)
